# Supplementary material
Source: bioRxiv or medRxiv preprint supplement (https://www.biorxiv.org/highwire/filestream/128077/field_highwire_adjunct_files/0/425751-1.pdf)
Supplement: Supplementary file [file 425751-1.pdf]

# Li et al. Etv6 Supplementary Data

**a**

MSSAQC<sup>peptide #1</sup>YVKQE<sup>pointed domain</sup>QIPYSPPE<sup>pointed domain</sup>SPAPNCTTSSPSQLNASGPRRYRMEEE<sup>pointed domain</sup>TVRLPAHLRLPPAHWSREDVSQWL<sup>pointed domain</sup>  
 RLAENEYSLHPIDANTFEMNGKALLLLTKEDFRYRC<sup>pointed domain</sup>PHSGDVL<sup>pointed domain</sup>YEV<sup>pointed domain</sup>LQHTLKERK<sup>pointed domain</sup>PRLVHSSLLHTGNSLHG<sup>pointed domain</sup><sup>peptide #2</sup>  
 QSEALISQNHNDHHSNRPLRTPSHNTPLNTPTIELLHRSRSPFANHHSSPDSESRPLRSPMETPLRRLSPA  
 ERLHRHASETNHHAQESYPLSVSPA<sup>ETS domain</sup>EANHC<sup>ETS domain</sup>SP<sup>ETS domain</sup>EPINK<sup>ETS domain</sup>PNS<sup>ETS domain</sup>PRQEN<sup>ETS domain</sup>PRVI<sup>ETS domain</sup>QL<sup>ETS domain</sup>MPS<sup>ETS domain</sup>IMH<sup>ETS domain</sup>PL<sup>ETS domain</sup>LL<sup>ETS domain</sup>NTR<sup>ETS domain</sup>HSM<sup>ETS domain</sup>E<sup>ETS domain</sup>FK  
 QPRLEDGQPREGKPINLSHREDMAYLNHMMVSVSPPGDHGMPIGRIAD<sup>ETS domain</sup>CRLLWDYVYQLLSDSR<sup>ETS domain</sup>YENFIR<sup>ETS domain</sup>  
<sup>ETS domain</sup>WEDKESMVFRIMDPNGLARLWGNHKNRTNMTYEKMSRALRHY<sup>ETS domain</sup>YKLNIRKEPGQ<sup>ETS domain</sup>RLLFRFMKTP<sup>ETS domain</sup>EEIMSG  
 RTDRLEHLES<sup>peptide #3</sup>QELDEQMYQEDEC<sup>peptide #3</sup>

**b**

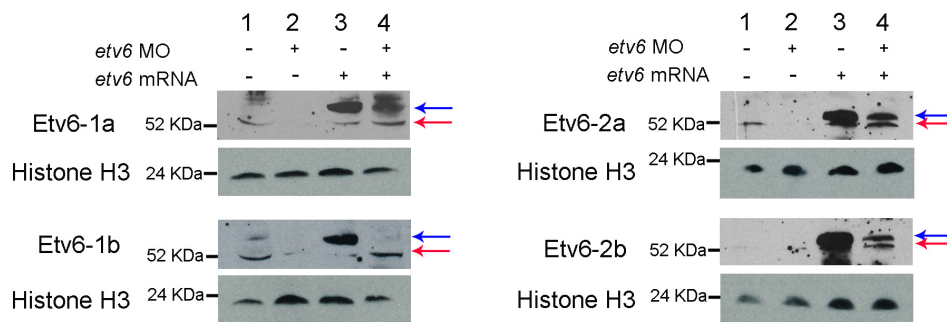

**c**

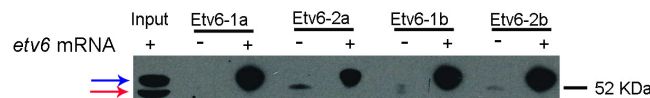

**Supplementary Figure 1. Generation and characterization of ChIP grade antibodies against *Xenopus* Etv6.** (a) Amino acid sequence for *Xenopus* Etv6 (Accession Number NP\_001124423.1). Pointed domain and ETS domain are indicated in green and blue, respectively. The sequences of the three peptides used for the generation of antibodies are indicated in red. Two rabbit polyclonal antibodies were obtained per peptide: Etv6-1a, -1b, -2a -2b, -3a, -3b. (b) Western blot validating the specificity of Etv6 antibodies. Protein extracts from stage 22 wild-type (WT), etv6-deficient (etv6 MO), etv6-overexpressing (HA-etv6 mRNA) or etv6-deficient + etv6-overexpressing (etv6 MO+HA-etv6 mRNA) somites were used for western blot analysis. While polyclonal antibodies generated from peptide 1 (Etv6-1a and Etv6-1b)

and peptide 2 (Etv6-2a and Etv6-2b) detect both endogenous and exogenous expression of Etv6, polyclonal antibodies generated from peptide 3 (Etv6-3a and Etv6-3b) did not detect expression of Etv6 and cross-reacted with an unknown protein (data not shown). Lane 1, WT; lane 2, 40 ng etv6 MO; lane 3, 1.0 ng etv6 mRNA; lane 4, 40 ng etv6 MO + 1.0 ng etv6 mRNA. The predicted molecular weight of Etv6 is around 52 KDa. ([http://web.expasy.org/compute\\_pi/](http://web.expasy.org/compute_pi/)). Blue and red arrows point to exogenous and endogenous expression of Etv6, respectively. (c)

Immunoprecipitation assay validating the affinity of anti *Xenopus* Etv6 antibodies to endogenous Etv6. Protein extracts from the somites of stage 22 WT embryos were used for immunoprecipitation; somite extracts from embryos injected with exogenous etv6 mRNA were used as positive control. Polyclonal antibodies generated from peptide 1 (Etv6-1a and Etv6-1b) and peptide 2 (Etv6-2a and Etv6-2b) were tested for their capacity to immunoprecipitate Etv6 protein. Western blot was performed using antibody Etv6-1b as primary antibody. Blots show that antibodies Etv6-2a and Etv6-2b could immunoprecipitate endogenous Etv6 protein. Antibody Etv6-2a showed greater affinity to Etv6 and was selected for subsequent experiments. Blue and red arrows point to exogenous and endogenous expression of Etv6, respectively.

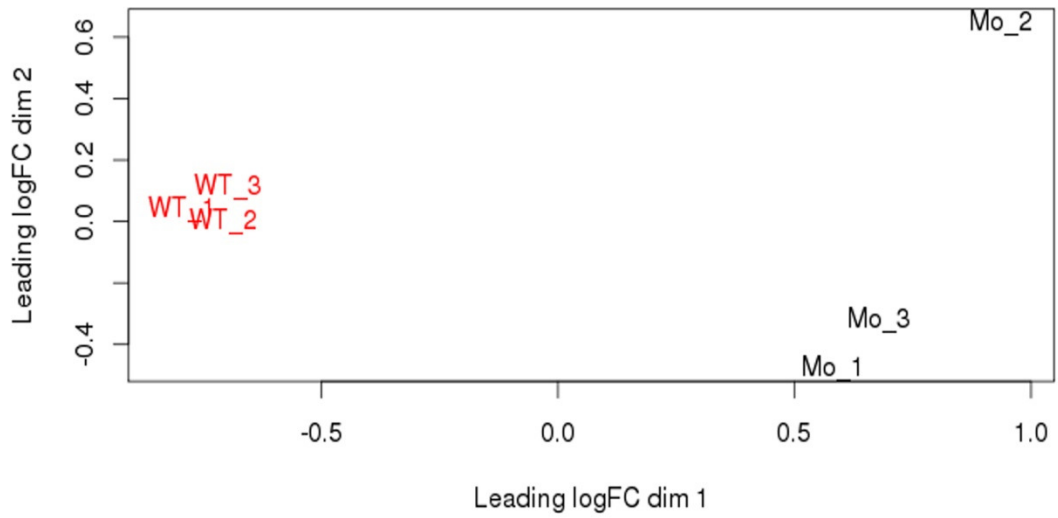

**Supplementary Figure 2. PCA plot illustrating the significant differences in the transcriptome of *etv6*-deficient (*etv6* MO) somites when compared to that of wild type (WT) somites. Three independent biological replicates were used for each condition.**

**a**

*Foxo3.L* locus: 5'- CCAAGACCCTTCTCGCAGCATGGCAGAAGCACTGCCTCC - 3'  
*Foxo3.L* MO sequence: 3'-GAAGAGCGTCGTACCGTCTTCGT -5'

*Foxo3.S* locus: 5'- GCAAGAGAGTTTCACACACCATGGCAGAAGCCGTGCCTCC - 3'  
*Foxo3.S* MO sequence: 3'-CAAGTGTGTGGTACCGTCTTCGG -5'

**b**

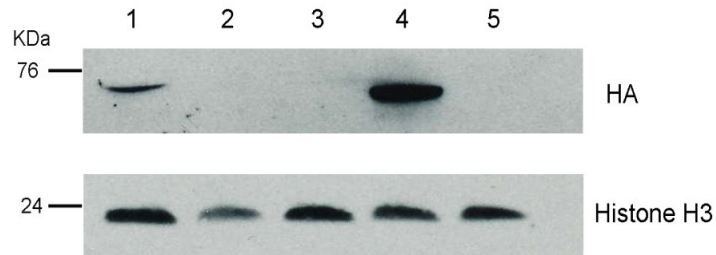

**c**

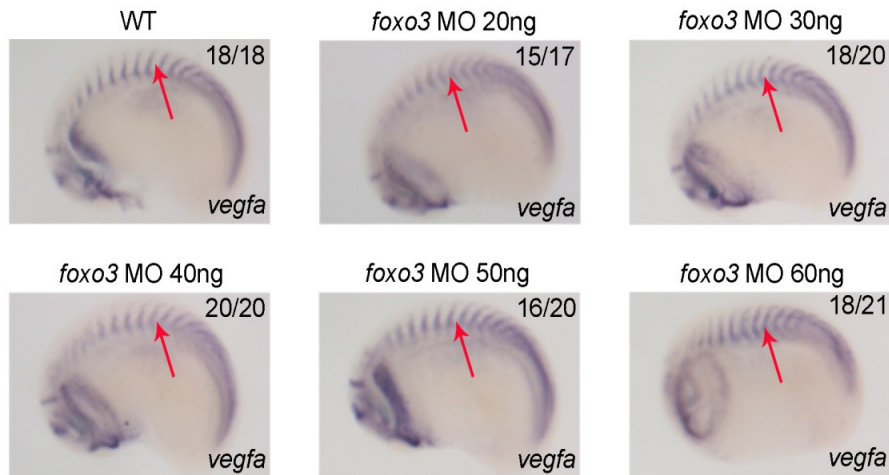

**Supplementary Figure 3. *Foxo3* deficiency has no effect on *vegfa* expression in the somites at stage 22 of development.** (a) *cDNA* alignment showing the sequence differences between *foxo3.L* and *foxo3.S*. Due to lack of homology in the region of the transcription starting codon, a single MO targeting both genes could not be generated. Therefore, two MOs, each one targeting a specific *foxo3* gene, were designed; their target sequence is highlighted in purple. (b) Western blot showing that *foxo3* MOs block efficiently the translation of their targets. To assess the efficiency of the *foxo3* MOs, the *cDNAs* for *foxo3.L* and *foxo3.S*, containing the sequences targeted by the MOs, were HA-tagged, mRNA was synthesised *in vitro* and injected into 2-cell stage embryos (0.5 ng per embryo). Translation of these *cDNAs* was blocked when co-injected with their corresponding blocking MO (30 ng). Lane 1, 0.5

ng foxo3.L-HA; lane 2, 0.5 ng foxo3.L-HA + 30 ng foxo3.L MO; lane 3, uninjected; lane 4, 0.5 ng foxo3.S-HA; lane 5, 0.5 ng foxo3.S-HA + 30 ng foxo3.S MO. Histone H3 was used as a loading control. (c) WISH showing that vegfa expression in the somites (arrows) is not affected in foxo3-deficient embryos. Foxo3 depletion was performed by co-injecting foxo3.L MO and foxo3.S MO in a 1:1 ratio to the total concentrations indicated. Images show stage 22 embryos in lateral view with anterior to the left and dorsal to the top. Numbers in top right corner indicate the number of embryos exhibiting the phenotype pictured.

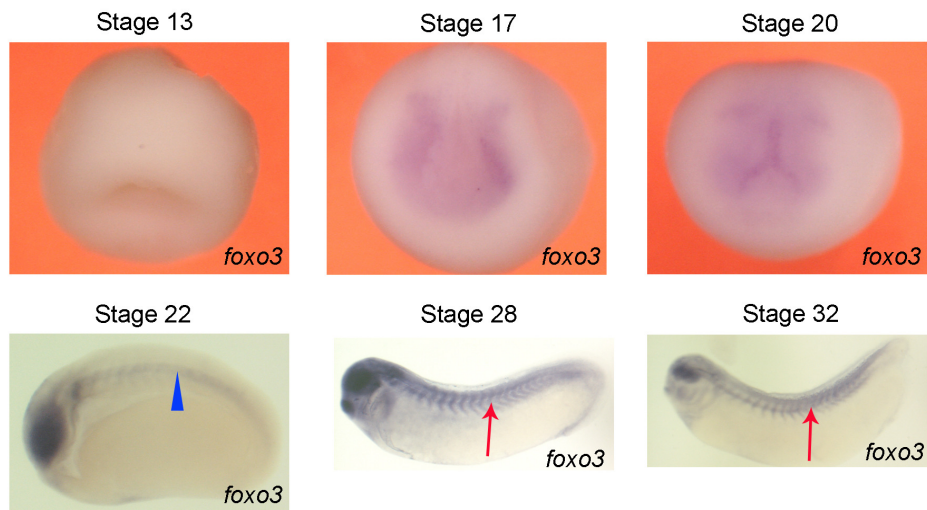

**Supplementary Figure 4. WISH showing the expression pattern of *foxo3* during early *Xenopus* development. *Foxo3* mRNA is not detected before stage 22 of development. At stage 22, its expression is detected in the notochord (arrowhead). Expression in the somites is detected at stage 28, i.e. after the establishment of definitive hemangioblast in the lateral plate mesoderm. Arrows in stage 28 and 32 embryos indicate expression in the somites. Stage 13-20 embryos are shown in anterior view with dorsal to the top. Stage 22-32 embryos are shown in lateral view with anterior to the left and dorsal to the top.**

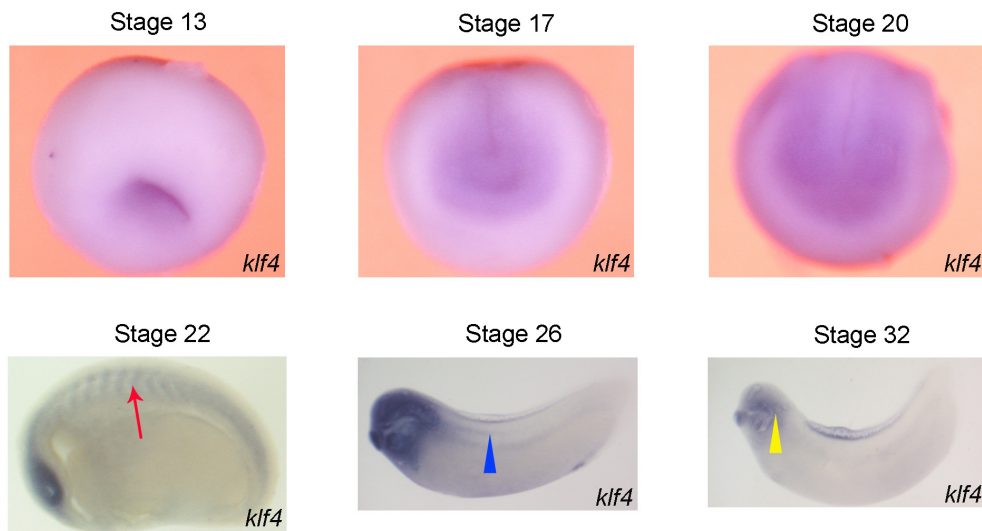

**Supplementary Figure 5. WISH showing that *klf4* is transiently expressed in the somites of *Xenopus* embryos.** *Klf4* mRNA is not detected before stage 22 of development. At stage 22, its expression is detected in the somites (red arrow) but this expression is extinguished by stage 26 (blue arrowhead indicates expression in the notochord). Yellow arrowhead in stage 32 embryo indicates expression in the head. Stage 13-20 embryos are shown in anterior view with dorsal to the top. Stage 22-32 embryos are shown in lateral view with anterior to the left and dorsal to the top.

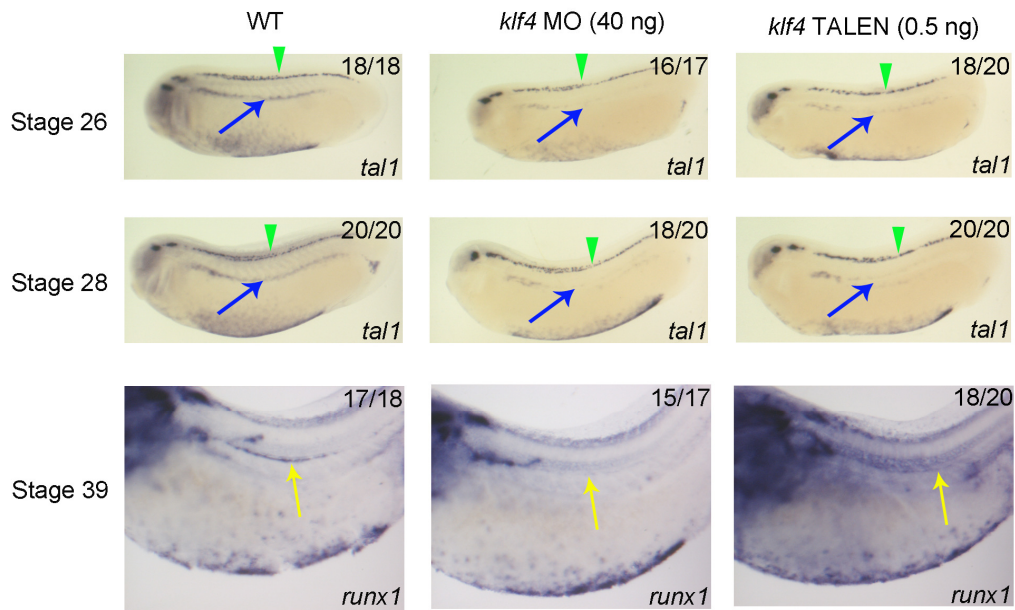

**Supplementary Figure 6. *Klf4* is required for the emergence of HSC. WISH** demonstrating that the establishment of definitive hemangioblasts in the lateral plate mesoderm, as indicated by *tal1* expression (arrows in stage 26 and 28 embryos), and hemogenic endothelium in the ventral wall of the dorsal aorta, as indicated by *runx1* expression (arrows in stage 39 embryos), is impaired in *klf4*-deficient embryos. Arrowheads in stage 26 and 28 embryos indicate expression of *tal1* in neurons, which is unaffected by *klf4* depletion. Embryos are shown in lateral view with anterior to the left and dorsal to the top. Numbers in top right corner indicate the number of embryos exhibiting the phenotype pictured.



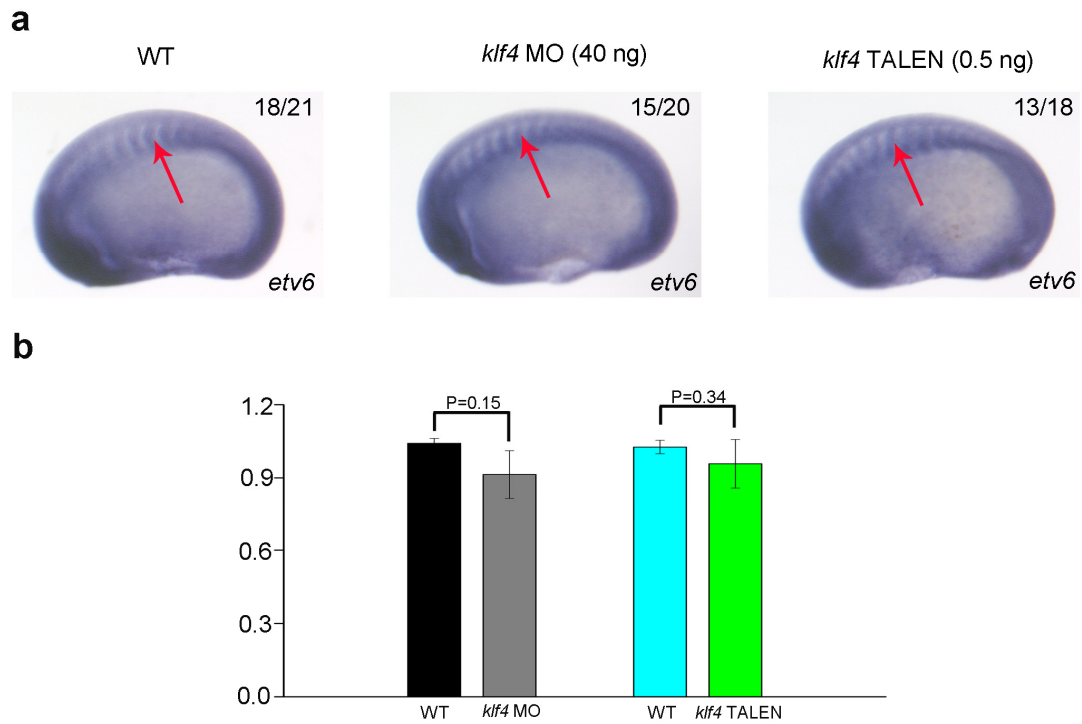

**Supplementary Figure 7. *Etv6* expression in the somites is not affected in *klf4*-deficient embryos.** (a) *WISH* showing *etv6* expression in the somites (arrows) of stage 22 WT, *klf4* MO- and *klf4* TALEN-injected embryos. Embryos are shown in lateral view with anterior to the left and dorsal to the top. Numbers in top right corner indicate the number of embryos exhibiting the phenotype pictured. (b) RT-qPCR confirming that similar levels of *etv6* mRNA are expressed in the somites of WT and *klf4*-deficient embryos at stage 22. Expression was normalized to *odc1*. Error bars represent SEM of three biological replicates.

**a**

```
ATTATCCAAAAGTTACACGCACACCGAAGCAATTCTCTTTTAAGATTTATTAGAAAAATAATTAA
TGAAACATCACATCGACGATTTCGATTCTGGTTTAAGCCTTTCTCAAGATGCTTCATCTCTATA
GAGAAGGCAGGCTGCAGCCTCAGTGTACATAACTAGGGGCGGCGGCGAGGGAGTGGCTTC
AGTGAGGGCGGGGCTTTGCTCAATTGGCTAGCCTGTGAGCAGAACCGGAGCTGCACAGAC
AGAAGAACGCAGTGTAAAGAAGAGAGACCCGGGAACAGGGAAGGGCTGAATTGCCGTTGTATA
GGACGGTACAAGGCTACAGGGCACAGCAGGATTATTCACCTCACGGTTGGCATATAGAGCAGG
CACTGAGTGCTGGAGATCGGGACCGGGGCATTTACGCGCGATGCATTGAGAGTTGGCGGAA
CTTTCCTGGGATCTTGTTACATTGTATCCGTGTCTGTTACGTTGTATCAACCAGTGGAGCCGTA
GGTTTTACCCAAAAGGATTATGTGGCCGCTGCTTCTGCTCTGGGGGCTGAGTGAGGGCCCG
TCCAATCGTTGCTCATTACCTACTGGGGGAGCCGGGACTTCTCCCTAATCTTGGGTTCCCCC
CACTCCCTGAGCCCCTCACCGGAAAATCATG
```

TSS →

**b**

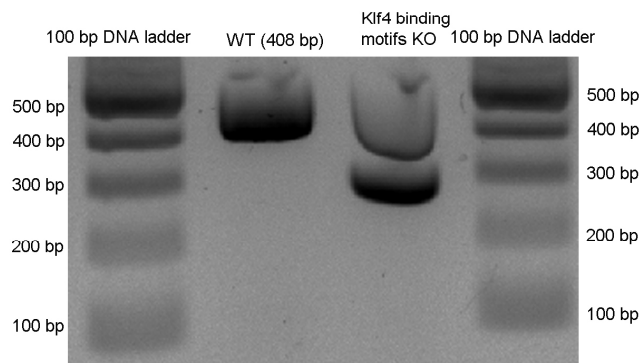

**c**

mutation #1: **GAGCAGAACCG** 11 bp deletion  
mutation #2: **TGAGCAGAACC** 11 bp deletion  
mutation #3: **AGCCTGTGAGCAGAACCGG** 19 bp deletion  
mutation #4: AA**GCCTTTCTCAAGATGCTTCATCTCTATAGAGAAAGGCAGGCTGCAGCCTCAGT**  
**GTCACATAACTAGGGGCGGCGGCGAGGGAGTGGCTTCAGTGAGGGCGGGGC**  
**TTTGCTCAATTGGCTAGCCTGTGAGCAGAAC** 136 bp deletion

**Supplementary Figure 8. Klf4 binding motifs in the *vegfa* promoter region were deleted using TALENs.** (a) DNA sequence for the *X. laevis vegfa* promoter (-653 bp ~ +3 bp) containing the Etv6 ChIP peak. The Etv6-peak sequence is indicated in red; Klf4 binding motifs under Etv6-peak are indicated in blue; the transcription start site is indicated in green; the TALENs designed for deletion of the Klf4 binding motifs are indicated in yellow and purple, respectively. (b) TALEN activity generated a range of deletions in the *vegfa* promoter. Genomic DNA was obtained from 20 WT and TALEN-injected stage 22 somites and PCR-amplified. The smaller product detected from TALEN-injected somites when compared to WT somites (~270 bp versus ~400 bp) represents the majority of the mutated sequences, as shown in (c). (c) Sequences showing the range of mutations caused by TALEN injection. The PCR products obtained in (b) were cloned and Sanger sequenced. TALENs caused mutations in

*100% of the clones sequenced (10/10). Mutation #1 was detected in two clones, mutation #2 in two clones, mutation #3 in one clone, and mutation #4 in five clones (50%).*

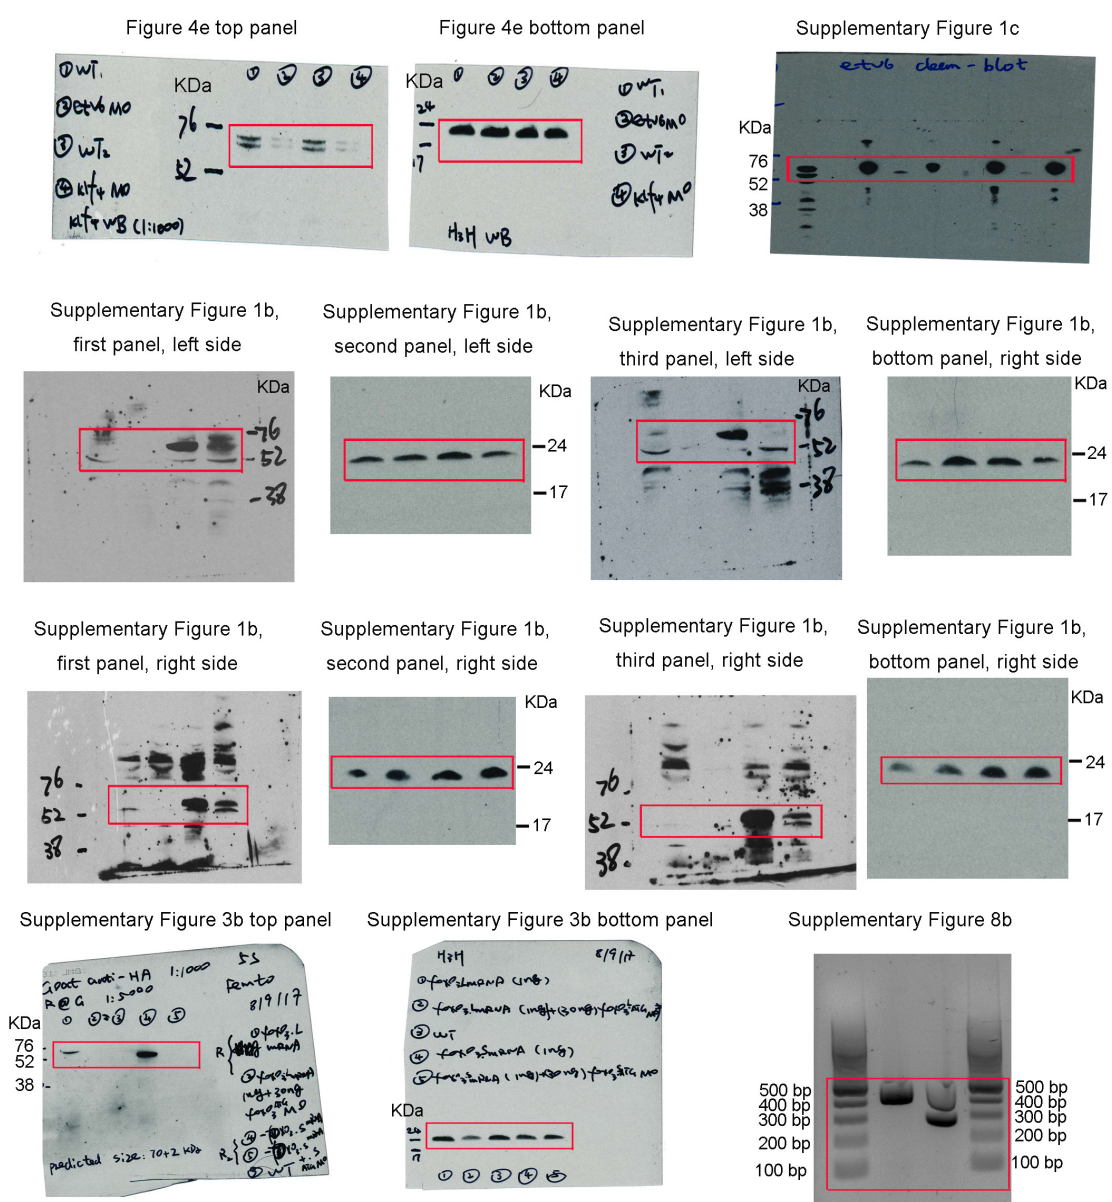

**Supplementary Figure 9. Uncropped western blots and agarose gel electrophoresis raw pictures used in the main and Supplementary Figures.**

**Supplementary Table 2. De novo motif analysis on the Etv6 CHIP-seq peaks located in the TSS region.**

| Rank | Motif                                                                               | P-value | % of Targets | % of Background | Best Match                                              |
|------|-------------------------------------------------------------------------------------|---------|--------------|-----------------|---------------------------------------------------------|
| 1    |    | 1e-922  | 66.01%       | 10.76%          | <i>Klf/Sp/Homer(0.90)</i>                               |
| 2    |    | 1e-334  | 30.22%       | 5.28%           | <i>NFY(CCAAT)/Promoter/Homer(0.94)</i>                  |
| 3    |    | 1e-106  | 21.32%       | 7.31%           | <i>MA0443.1_btd/Jaspar(0.690)</i>                       |
| 4    |    | 1e-80   | 17.26%       | 6.11%           | <i>bZIP_CREB/Jaspar(0.93)</i>                           |
| 5    |    | 1e-74   | 62.36%       | 43.87%          | <i>MA0498.1_Meis1/Jaspar(0.907)</i>                     |
| 6    |    | 1e-62   | 15.29%       | 15.29%          | <i>MA0528.1_ZNF263/Jaspar(0.724)</i>                    |
| 7    |    | 1e-47   | 31.16%       | 18.79%          | <i>MA0319.1_HSF1/Jaspar(0.762)</i>                      |
| 8    |    | 1e-45   | 15.87%       | 7.31%           | <i>POL010.1_DCE_S_III/Jaspar(0.761)</i>                 |
| 9    |   | 1e-39   | 17.79%       | 9.16%           | <i>PB0122.1_Foxk1_2/Jaspar(0.818)</i>                   |
| 10   |  | 1e-37   | 3.53%        | 0.59%           | <i>AtMYB15(MYB)/Arabidopsis thaliana/AthaMap(0.676)</i> |
| 11   |  | 1e-32   | 3.49%        | 0.68%           | <i>GFY(?)/Promoter/Homer(0.928)</i>                     |
| 12   |  | 1e-31   | 6.93%        | 2.45%           | <i>STB5/STB5_YPD/Yeast(0.749)</i>                       |
| 13   |  | 1e-31   | 10.74%       | 4.87%           | <i>PB0056.1_Rfxdc2_1/Jaspar(0.911)</i>                  |
| 14   |  | 1e-28   | 8.94%        | 3.87%           | <i>MA0127.1_PEND/Jaspar(0.816)</i>                      |
| 15   |  | 1e-27   | 5.78%        | 1.99%           | <i>YY1(Zf)/Promoter/Homer(0.760)</i>                    |
| 16   |  | 1e-26   | 11.28%       | 5.57%           | <i>MA0374.1_RSC3/Jaspar(0.698)</i>                      |
| 17   |  | 1e-18   | 2.34%        | 0.54%           | <i>Stat3(Stat)/Homer(0.898)</i>                         |
| 18   |  | 1e-17   | 3.90%        | 1.40%           | <i>SeqBias: polyA-repeat(0.888)</i>                     |
| 19   |  | 1e-15   | 1.15%        | 0.14%           | <i>nub/fly(0.692)</i>                                   |
| 20   |  | 1e-14   | 0.62%        | 0.03%           | <i>MA0326.1_MAC1/Jaspar(0.659)</i>                      |
| 21   |  | 1e-9    | 0.37%        | 0.02%           | <i>MA0537.1_BLMF-1/Jaspar(0.607)</i>                    |
| 22   |  | 1e-5    | 0.16%        | 0.01%           | <i>MA0362.1_RDS2/Jaspar(0.645)</i>                      |

**Supplementary Table 6. De novo motif analysis on Etv6 ChIP-seq peaks associated with the TSS region of genes activated or repressed by Etv6.**

*Motifs overrepresented in the Etv6 peaks associated with the TSS region of genes activated by Etv6*

| Rank | Motif                                                                             | P-value | % of Targets | % of Background | Best Match                      |
|------|-----------------------------------------------------------------------------------|---------|--------------|-----------------|---------------------------------|
| 1    |  | 1e-65   | 68.97%       | 15.33%          | Klf/Sp/Homer(0.87)              |
| 2    |  | 1e-24   | 21.67%       | 2.97%           | NFY(CCAAT)/Promoter/Homer(0.93) |
| 3    |  | 1e-12   | 16.75%       | 3.70%           | hkb/fly(0.850)                  |
| 4    |  | 1e-12   | 2.46%        | 0.01%           | CREB/Jaspar (0.74)              |
| 5    |  | 1e-12   | 2.46%        | 0.01%           | Hox/Jaspar(0.68)                |
| 6    |  | 1e-12   | 4.43%        | 0.10%           | Smad/Homer (0.62)               |

*Motifs overrepresented in the Etv6 peaks associated with the TSS region of genes repressed by Etv6*

| Rank | Motif                                                                               | P-value | % of Targets | % of Background | Best Match                      |
|------|-------------------------------------------------------------------------------------|---------|--------------|-----------------|---------------------------------|
| 1    |  | 1e-123  | 66.37%       | 11.78%          | Klf/Sp/Homer(0.89)              |
| 2    |  | 1e-46   | 23.98%       | 3.15%           | NFY(CCAAT)/Promoter/Homer(0.91) |
| 3    |  | 1e-26   | 23.68%       | 5.87%           | MA0260.1_che-1/Jaspar(0.668)    |
| 4    |  | 1e-23   | 19.59%       | 4.49%           | Klf/Sp/Homer(0.804)             |
| 5    |  | 1e-21   | 12.57%       | 1.9%            | PB0167.1_Sox13_2/Jaspar (0.67)  |
| 6    |  | 1e-17   | 19.30%       | 5.64%           | NPAS2(bHLH) /Homer (0.84)       |
| 7    |  | 1e-16   | 8.77%        | 1.17%           | bZIP_CREB /Jaspar (0.87)        |
| 8    |  | 1e-16   | 20.18%       | 6.55%           | MA0498.1_Meis/Jaspar (0.76)     |
| 9    |  | 1e-14   | 16.37%       | 4.98%           | MA0374.1_RSC3/Jaspar (0.72)     |
| 10   |  | 1e-13   | 17.84%       | 5.88%           | Tcf3(HMG) /Homer (0.69)         |
| 11   |  | 1e-13   | 6.14%        | 0.65%           | ELF1(ETS) /Homer (0.65)         |
| 12   |  | 1e-12   | 3.80%        | 0.18%           | ETS1(ETS)/Promoter/Homer (0.58) |

**Supplementary Table 8. Probes used for *in situ* hybridization. Probes were designed to target both L and S genes unless otherwise indicated.**

| <b>Gene Name</b> | <b>Accession Number</b> | <b>Restriction Enzyme</b>  | <b>RNA Polymerase</b> | <b>Reference</b>                          |
|------------------|-------------------------|----------------------------|-----------------------|-------------------------------------------|
| <i>Meox2</i>     | L20432                  | <i>SacII</i>               | SP6                   | <i>This Report</i>                        |
| <i>Crim1</i>     | EU882845                | <i>ApaI</i>                | SP6                   | <i>This Report</i>                        |
| <i>Sox18</i>     | BC072123                | <i>Sall</i> or <i>SmaI</i> | T7                    | <i>This Report</i>                        |
| <i>Vegfa.L</i>   |                         | <i>BamHI</i>               | T7                    | <i>Cleaver et al., 1997<sup>1</sup></i>   |
| <i>Foxo3</i>     | AJ783964                | <i>Sall</i>                | T7                    | <i>This Report</i>                        |
| <i>Klf4</i>      | BC055956                | <i>Sall</i> or <i>SacI</i> | T7                    | <i>This Report</i>                        |
| <i>Runx1</i>     |                         | <i>Sall</i>                | T7                    | <i>Tracey et al., 1998<sup>2</sup></i>    |
| <i>Tal1</i>      |                         | <i>XhoI</i>                | SP6                   | <i>Ciau-Uitz et al., 2010<sup>3</sup></i> |
| <i>Etv6</i>      | EU760352                | <i>NotI</i> or <i>SacI</i> | T7                    | <i>Ciau-Uitz et al., 2010<sup>3</sup></i> |

**Supplementary Table 9. MO sequences.**

| <b>Gene Name</b> | <b>MO sequence</b>         | <b>References</b>                         |
|------------------|----------------------------|-------------------------------------------|
| <i>Etv6</i>      | GTAACACTGGGCTGAAGACATTTCC  | <i>Ciau-Uitz et al., 2010<sup>3</sup></i> |
| <i>Foxo3.L</i>   | TGCTTCTGCCATGCTGCGAGAAG    | <i>This report</i>                        |
| <i>Foxo3.S</i>   | GGCTTCTGCCATGGTGTGTGAAC    | <i>This report</i>                        |
| <i>Klf4</i>      | CTGCCTCATTAAATCTGGGAGGGTCA | <i>This report</i>                        |

**Supplementary Table 10. Primer sequences for cloning.**

| <b>Gene</b>                  |                | <b>Primer sequences</b>                           | <b>References</b>  |
|------------------------------|----------------|---------------------------------------------------|--------------------|
| <i>Etv6.S</i>                | <i>Forward</i> | <i>actctagagatatcgagctcgaggtttctgttcccagagg</i>   | <i>This report</i> |
| <i>mRNA</i>                  | <i>Reverse</i> | <i>acatcgtatggatatcgggatccgcattcatcctcctgatac</i> |                    |
| <i>Foxo3.L</i>               | <i>Forward</i> | <i>cgactctagacttctcgcagcatggcagaagcactgcc</i>     | <i>This report</i> |
| <i>mRNA</i>                  | <i>Reverse</i> | <i>agacgtcgacgcctggcaccagctc</i>                  |                    |
| <i>Foxo3.S</i>               | <i>Forward</i> | <i>cgactctagagttcacacaccatggcagaagccgtgcc</i>     | <i>This report</i> |
| <i>mRNA</i>                  | <i>Reverse</i> | <i>agacgtcgacgcctggcaccagctc</i>                  |                    |
| <i>Klf4 talen</i>            | <i>Forward</i> | <i>tagtcactggctttggctgc</i>                       | <i>This report</i> |
| <i>test</i>                  | <i>Reverse</i> | <i>gcaggatactcacattgcct</i>                       |                    |
| <i>Klf4 binding motif KO</i> | <i>Forward</i> | <i>cgcacaccgaagcaattctc</i>                       | <i>This report</i> |
| <i>talen test</i>            | <i>Reverse</i> | <i>ctcaatgcatcgcgctaaa</i>                        |                    |

**Supplementary Table 11. Primer sequences for RT-qPCR. Primers were designed to target both L and S genes.**

| <b>Gene Name</b> |                | <b>Primer sequences</b>   | <b>References</b>  |
|------------------|----------------|---------------------------|--------------------|
| <i>Foxo3</i>     | <i>Forward</i> | <i>tccgctccgtgcctactt</i> | <i>This report</i> |
|                  | <i>Reverse</i> | <i>cgcttcttggcctttcc</i>  |                    |



|             |                |                              |                    |
|-------------|----------------|------------------------------|--------------------|
| <i>Klf4</i> | <i>Forward</i> | <i>tcgggaaagacctataccaag</i> | <i>This report</i> |
|             | <i>Reverse</i> | <i>ttcgtagtggcgggtcag</i>    |                    |
| <i>Etv6</i> | <i>Forward</i> | <i>gccgcctactctgggattac</i>  | <i>This report</i> |
|             | <i>Reverse</i> | <i>gcgcagagcccgtgacatc</i>   |                    |
| <i>Odc</i>  | <i>Forward</i> | <i>ggcgacatttgaaaaagca</i>   | <i>This report</i> |
|             | <i>Reverse</i> | <i>cgggttgcatagataatcc</i>   |                    |

**Supplementary Table 12. Primer sequences for ChIP-qPCR. Primers were designed to target both L and S genes unless otherwise indicated.**

| <b>Gene Name</b>              |                | <b>Primer sequences</b>         | <b>References</b>  |
|-------------------------------|----------------|---------------------------------|--------------------|
| <i>Foxo3</i><br><i>peak</i>   | <i>Forward</i> | <i>agcctgtcaccctgcgcgcc</i>     | <i>This report</i> |
|                               | <i>Reverse</i> | <i>ccagggctcctccccttc</i>       |                    |
| <i>Foxo3</i><br><i>exon2</i>  | <i>Forward</i> | <i>tgattctcccctgtcccctatg</i>   | <i>This report</i> |
|                               | <i>Reverse</i> | <i>tgctgtgaagaagtgagagaaatg</i> |                    |
| <i>Klf4</i><br><i>peak</i>    | <i>Forward</i> | <i>gcggggcttgtctccacgtgat</i>   | <i>This report</i> |
|                               | <i>Reverse</i> | <i>gccagggcaccggaac</i>         |                    |
| <i>Klf4</i><br><i>intron2</i> | <i>Forward</i> | <i>agcatctccagacagccaaagt</i>   | <i>This report</i> |
|                               | <i>Reverse</i> | <i>gtaggtggtgcaatatctcttaa</i>  |                    |

Vegfa.L Forward tgcagcctcagtgacataac This report  
peak Reverse cccgggtctcttcttacact

Vegfa.L Forward ggccgacagtaagcgattca This report  
intron1 Reverse cccccaccccaggaaatgat

---

### Supplementary references

- 1 Cleaver, O., Tonissen, K. F., Saha, M. S. & Krieg, P. A. Neovascularization of the *Xenopus* embryo. *Dev Dyn* **210**, 66-77, doi:10.1002/(SICI)1097-0177(199709)210:1<66::AID-AJA7>3.0.CO;2-# (1997).
- 2 Tracey WD Jr, Pepling ME, Horb ME, Thomsen GH & JP., G. A *Xenopus* homologue of AML1 reveals unexpected patterning mechanisms leading to the formation of embryonic blood. *Development* **125**, 1372-1380 (1998).
- 3 Ciau-Uitz, A., Pinheiro, P., Gupta, R., Enver, T. & Patient, R. *Tel1/ETV6* Specifies Blood Stem Cells through the Agency of VEGF Signaling. *Developmental Cell* **18**, 569-578, doi:10.1016/j.devcel.2010.02.009 (2010).
